# Supplementary material for: Exploring the Role of Empathy as a Dual Mediator in the Relationship between Human–Pet Attachment and Quality of Life: A Survey Study among Adult Dog Owners
Source: MDPI journal article supplement (doi:10.3390/ani13132220), 2023-07-06
Supplement: s1 [file s1]

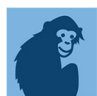**Table S1.** Study participant sociodemographic data (n = 263).

| Variables                      | Category                  | Frequency (N) | Percentage (%) |
|--------------------------------|---------------------------|---------------|----------------|
| Gender                         | Male                      | 97            | 36.9           |
|                                | Female                    | 166           | 63.1           |
| Age group                      | 20s                       | 69            | 26.2           |
|                                | 30s                       | 154           | 58.6           |
|                                | 40s                       | 29            | 11             |
|                                | 50s                       | 11            | 4.2            |
| Education level                | High school or lower      | 25            | 9.5            |
|                                | College                   | 51            | 19.4           |
|                                | Undergraduate degree      | 177           | 67.3           |
|                                | Master's degree or higher | 10            | 3.8            |
| Occupation                     | Student                   | 13            | 4.9            |
|                                | Office worker             | 186           | 70.7           |
|                                | Self-employed             | 26            | 9.9            |
|                                | Freelancer                | 18            | 6.8            |
|                                | Homemaker                 | 11            | 4.2            |
|                                | Unemployed                | 9             | 3.4            |
| Marital status                 | Married                   | 65            | 24.7           |
|                                | Unmarried                 | 198           | 75.3           |
| Monthly income                 | Under \$200               | 39            | 14.8           |
|                                | \$1001–\$1500             | 135           | 51.3           |
|                                | \$1501–\$2000             | 62            | 23.6           |
|                                | Over \$2001               | 27            | 10.3           |
| Parenting experience           | First-time parents        | 213           | 81             |
|                                | Second over               | 50            | 19             |
| Breed of dog                   | Maltese                   | 50            | 19             |
|                                | Pomeranian                | 50            | 19             |
|                                | Poodle                    | 53            | 20.2           |
|                                | Mixed breed               | 53            | 20.2           |
|                                | Shih Tzu                  | 26            | 9.9            |
|                                | Chihuahua                 | 13            | 4.9            |
|                                | Bichon Prize              | 11            | 4.2            |
|                                | Other                     | 7             | 2.7            |
| Number of pet dogs owned       | One dog                   | 250           | 95.1           |
|                                | Two or more dogs          | 13            | 4.9            |
| Dog age (years)                | Under 3 years old         | 125           | 47.5           |
|                                | 4–6 years old             | 85            | 32.3           |
|                                | 7–9 years old             | 25            | 9.5            |
|                                | Over 10 years old         | 28            | 10.6           |
| Period of upbringing (dog age) | Under 3 years old         | 142           | 54             |
|                                | 4–6 years old             | 67            | 25.5           |
|                                | 7–9 years old             | 20            | 7.6            |
|                                | Over 10 years old         | 34            | 12.9           |
| Total                          |                           | 263           | 100            |

**Table S2.** Results of Lexington attachment to pets scale factor and reliability analyses.

| Variables             | Factors      |       |       | Eigenvalue<br>(Descriptive Variance) | Cronbach's $\alpha$ |
|-----------------------|--------------|-------|-------|--------------------------------------|---------------------|
|                       | 1            | 2     | 3     |                                      |                     |
| General attachment    | attachment2  | 0.820 |       | 5.640<br>(24.521)                    | 0.921               |
|                       | attachment4  | 0.774 |       |                                      |                     |
|                       | attachment3  | 0.728 |       |                                      |                     |
|                       | attachment6  | 0.675 |       |                                      |                     |
|                       | attachment8  | 0.647 |       |                                      |                     |
|                       | attachment10 | 0.639 |       |                                      |                     |
|                       | attachment5  | 0.608 |       |                                      |                     |
|                       | attachment7  | 0.586 |       |                                      |                     |
|                       | attachment11 | 0.584 |       |                                      |                     |
|                       | attachment1  | 0.583 |       |                                      |                     |
|                       | attachment9  | 0.557 |       |                                      |                     |
| Person substitution   | attachment17 |       | 0.726 | 4.190<br>(18.218)                    | 0.841               |
|                       | attachment13 |       | 0.720 |                                      |                     |
|                       | attachment18 |       | 0.705 |                                      |                     |
|                       | attachment16 |       | 0.627 |                                      |                     |
|                       | attachment15 |       | 0.620 |                                      |                     |
|                       | attachment14 |       | 0.573 |                                      |                     |
|                       | attachment12 |       | 0.525 |                                      |                     |
| Animal rights/welfare | attachment22 |       | 0.824 | 3.739<br>(16.257)                    | 0.860               |
|                       | attachment21 |       | 0.676 |                                      |                     |
|                       | attachment20 |       | 0.639 |                                      |                     |
|                       | attachment19 |       | 0.637 |                                      |                     |
|                       | attachment23 |       | 0.619 |                                      |                     |

**Table S3.** Results of interpersonal reactivity index factor and reliability analysis.

| Variables         |           | Factors |       | Eigenvalue<br>(Descriptive Variance) | Cronbach's $\alpha$ |
|-------------------|-----------|---------|-------|--------------------------------------|---------------------|
|                   |           | 1       | 2     |                                      |                     |
| Cognitive empathy | empathy2  | 0.822   |       | 6.318<br>(22.564)                    | 0.899               |
|                   | empathy7  | 0.813   |       |                                      |                     |
|                   | empathy4  | 0.755   |       |                                      |                     |
|                   | empathy5  | 0.75    |       |                                      |                     |
|                   | empathy13 | 0.721   |       |                                      |                     |
|                   | empathy1  | 0.698   |       |                                      |                     |
|                   | empathy11 | 0.604   |       |                                      |                     |
|                   | empathy9  | 0.574   |       |                                      |                     |
|                   | empathy8  | 0.552   |       |                                      |                     |
|                   | empathy14 | 0.551   |       |                                      |                     |
|                   | empathy3  | 0.549   |       |                                      |                     |
|                   | empathy10 | 0.545   |       |                                      |                     |
|                   | empathy6  | 0.513   |       |                                      |                     |
|                   | empathy12 | 0.508   |       |                                      |                     |
| Affective empathy | empathy19 |         | 0.82  | 5.942<br>(21.222)                    | 0.881               |
|                   | empathy20 |         | 0.738 |                                      |                     |
|                   | empathy16 |         | 0.672 |                                      |                     |
|                   | empathy18 |         | 0.666 |                                      |                     |
|                   | empathy21 |         | 0.607 |                                      |                     |
|                   | empathy22 |         | 0.603 |                                      |                     |
|                   | empathy28 |         | 0.601 |                                      |                     |
|                   | empathy17 |         | 0.576 |                                      |                     |
|                   | empathy26 |         | 0.566 |                                      |                     |
|                   | empathy15 |         | 0.565 |                                      |                     |
|                   | empathy24 |         | 0.555 |                                      |                     |
|                   | empathy27 |         | 0.549 |                                      |                     |
|                   | empathy25 |         | 0.53  |                                      |                     |
|                   | empathy23 |         | 0.522 |                                      |                     |
